# Supplementary material for: Two rare {M2(MoO4)2}n chain-containing molybdate-based metal–organic complexes with a bis-pyrazole-bis-amide ligand: fluorescent sensing and photocatalysis performance
Source: Royal Society of Chemistry journal article supplement (doi:10.1039/d0ra01420f), 2020-01-01
Supplement: d0ra01420f1.pdf [file d0ra01420f1.pdf]

**Two rare  $\{M_2(MoO_4)_2\}_n$  chain-contained molybdate-based metal-organic complexes with bis-pyrazole-bis-amide ligand: fluorescent sensing and photocatalysis performance**

Xiuli Wang<sup>\*#</sup>, Xiang Pan<sup>#</sup>, Xiang Wang<sup>\*</sup>, Yan Li and Guocheng Liu

*\*Corresponding authors, E-mail addresses: wangxiuli@bhu.edu.cn (X. L. Wang); E-mail:*

*wx\_2007@163.com (X. Wang).*

*College of Chemistry and Chemical Engineering, Professional Technology Innovation Center of Liaoning Province for Conversion Materials of Solar Cell, Bohai University, Jinzhou 121013, P.*

*R. China.*

*#Theses authors contributed equally to this work.*

**Supporting Information**

**Table S1.** Selected bond distances (Å) and angles (°) for complexes **1–2**.

| Complex 1           |            |                   |            |
|---------------------|------------|-------------------|------------|
| Co(1)–O(3)          | 2.054(4)   | Co(1)–N(1)        | 2.111(4)   |
| Co(1)–O(4)#1        | 2.079(4)   | Co(1)–N(2)        | 2.128(4)   |
| Co(1)–O(5)#2        | 2.089(4)   | Co(1)–O(1)        | 2.184(3)   |
| O(3)–Co(1)–O(4)#1   | 93.54(15)  | O(5)#2–Co(1)–N(2) | 93.14(15)  |
| O(3)–Co(1)–O(5)#2   | 88.75(14)  | N(1)–Co(1)–N(2)   | 162.09(18) |
| O(4)#1–Co(1)–O(5)#2 | 177.69(14) | O(3)–Co(1)–O(1)   | 178.09(15) |
| O(3)–Co(1)–N(1)     | 93.67(16)  | O(4)#1–Co(1)–O(1) | 88.16(14)  |
| O(4)#1–Co(1)–N(1)   | 88.49(16)  | O(5)#2–Co(1)–O(1) | 89.54(14)  |
| O(5)#2–Co(1)–N(1)   | 91.65(16)  | N(1)–Co(1)–O(1)   | 87.24(16)  |
| O(3)–Co(1)–N(2)     | 103.68(16) | N(2)–Co(1)–O(1)   | 75.55(15)  |
| O(4)#1–Co(1)–N(2)   | 86.04(16)  |                   |            |

Symmetry code for **1**: #1  $-x + 1/2, y + 1/2, -z + 3/2$ ; #2  $-x + 1/2, y - 1/2, -z + 3/2$

| Complex 2           |            |                   |            |
|---------------------|------------|-------------------|------------|
| Zn(1)–O(4)#1        | 2.014(3)   | Zn(1)–N(1)        | 2.124(3)   |
| Zn(1)–N(2)          | 2.093(3)   | Zn(1)–O(2)        | 2.146(3)   |
| Zn(1)–O(5)#2        | 2.120(3)   | Zn(1)–O(1)        | 2.299(3)   |
| O(4)#1–Zn(1)–N(2)   | 97.17(12)  | O(5)#2–Zn(1)–O(2) | 174.51(10) |
| O(4)#1–Zn(1)–O(5)#2 | 90.37(11)  | N(1)–Zn(1)–O(2)   | 85.21(12)  |
| N(2)–Zn(1)–O(5)#2   | 92.40(12)  | O(4)#1–Zn(1)–O(1) | 178.03(11) |
| O(4)#1–Zn(1)–N(1)   | 105.43(12) | N(2)–Zn(1)–O(1)   | 84.13(11)  |
| N(2)–Zn(1)–N(1)     | 156.71(13) | O(5)#2–Zn(1)–O(1) | 88.10(10)  |
| O(5)#2–Zn(1)–N(1)   | 92.98(12)  | N(1)–Zn(1)–O(1)   | 73.42(11)  |
| O(4)#1–Zn(1)–O(2)   | 95.10(11)  | O(2)–Zn(1)–O(1)   | 86.42(11)  |
| N(2)–Zn(1)–O(2)     | 87.29(12)  |                   |            |

Symmetry code for **2**: #1  $-x + 3/2, y - 1/2, -z + 3/2$ ; #2  $x, y - 1, z$

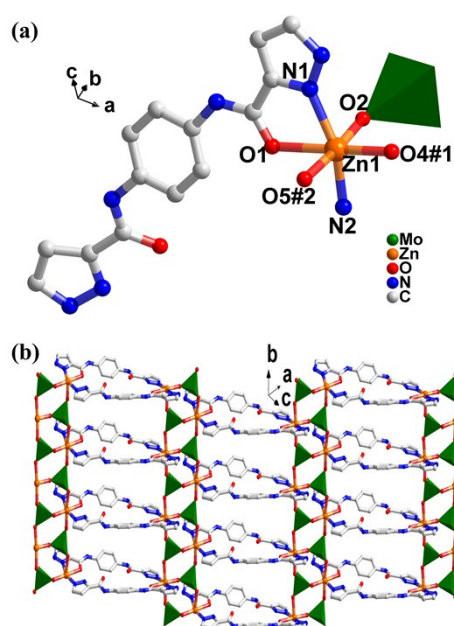**Figure S1.** (a) Ball/stick/polyhedron view of the asymmetric unit of complex **2**. The hydrogen atoms are omitted for clarity; (b) The 2D structure of complex **2**.

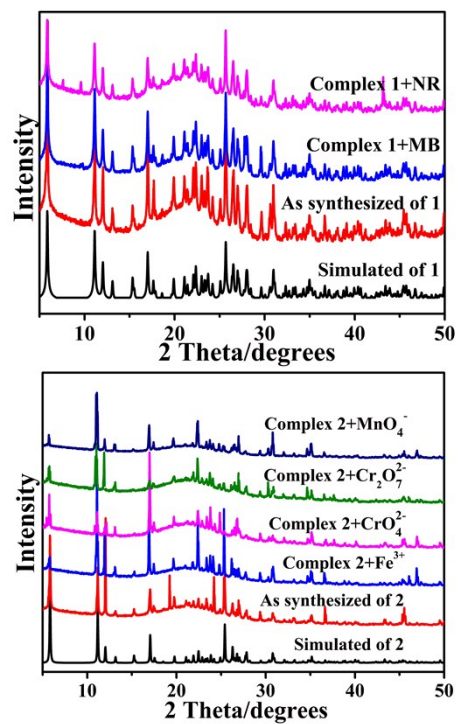

Figure S2. PXRD patterns of complexes 1–2.

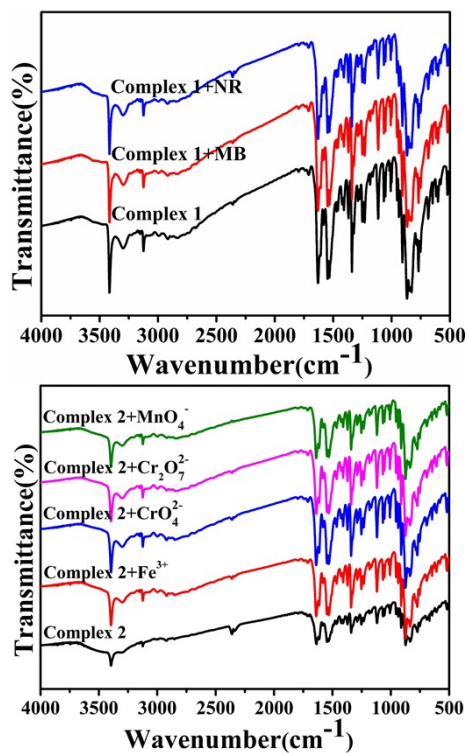

Figure S3. The IR spectra of complexes 1–2.

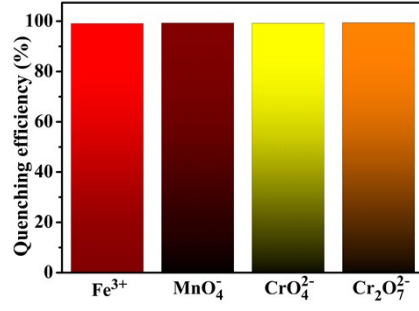

Figure S4. Fluorescence quenching efficiency of complex 2.

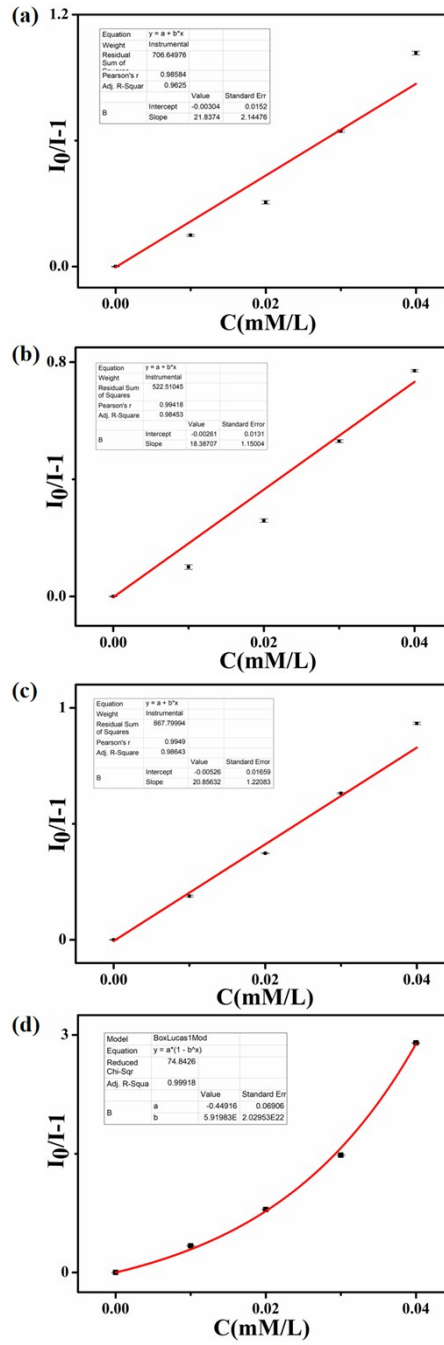

Figure S5. (a) The fluorescence intensity vs.  $\text{Fe}^{3+}$ , (b)  $\text{MnO}_4^-$ , (c)  $\text{CrO}_4^{2-}$  and (d)  $\text{Cr}_2\text{O}_7^{2-}$  concentration plot.

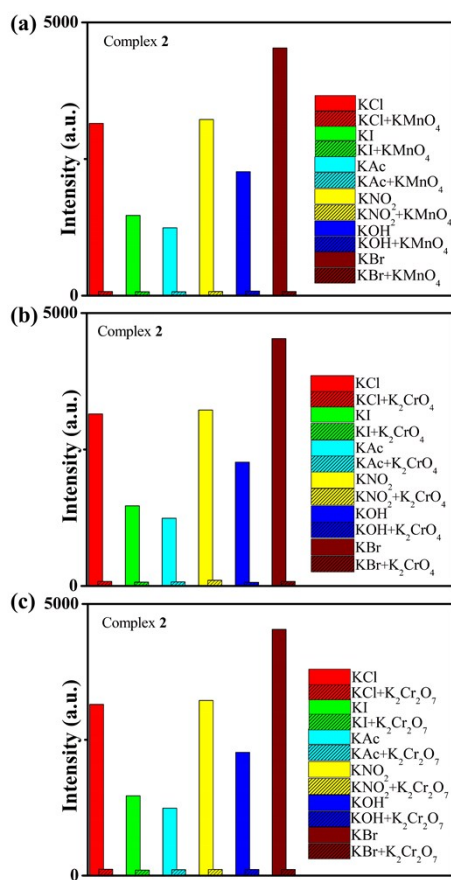

**Figure S6.** Fluorescence emission intensities of **2** at room temperature upon the addition of  $\text{MnO}_4^-$  (a),  $\text{CrO}_4^{2-}$  (b) and  $\text{Cr}_2\text{O}_7^{2-}$  (c) anions.

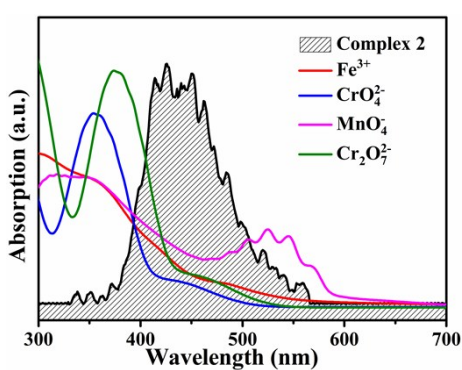

**Figure S7.** UV-Vis absorption spectra of  $\text{Fe}^{3+}$ ,  $\text{MnO}_4^-$ ,  $\text{CrO}_4^{2-}$  and  $\text{Cr}_2\text{O}_7^{2-}$  aqueous solution.

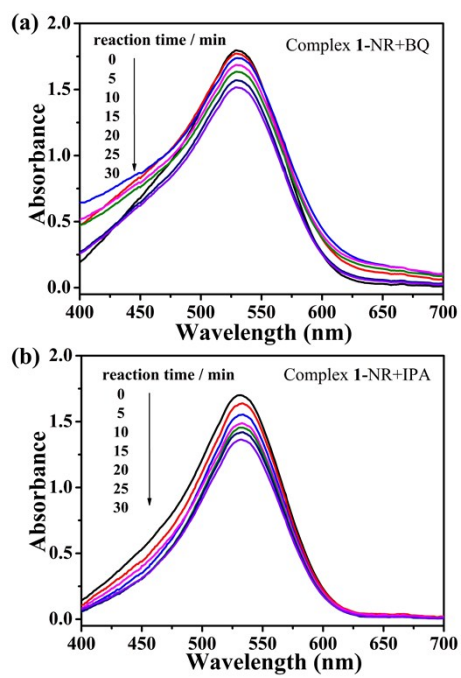

**Figure S8.** Trapping experiments of active species (a) BQ and (b) IPA during the photocatalytic degradation NR reaction for complex **1**.
